# Supplementary material for: Mono, bi- and tri-exponential diffusion MRI modelling for renal solid masses and comparison with histopathological findings
Source: Springer Nature journal article supplement (doi:10.1186/s40644-018-0178-0), 2018-11-26
Supplement: MOESM3 [file 25788854]

**Table S1:** Comparison of diffusion coefficients MD,  $D_{mono}$ ,  $D_{bi}$ ,  $D_{tri}$

|                                                                                 | <b>MD</b><br>[10 <sup>-3</sup> mm <sup>2</sup> /s] | <b>D<sub>mono</sub></b><br>[10 <sup>-3</sup> mm <sup>2</sup> /s] | <b>D<sub>bi</sub></b><br>[10 <sup>-3</sup> mm <sup>2</sup> /s] | <b>D<sub>tri</sub></b><br>[10 <sup>-3</sup> mm <sup>2</sup> /s] |
|---------------------------------------------------------------------------------|----------------------------------------------------|------------------------------------------------------------------|----------------------------------------------------------------|-----------------------------------------------------------------|
| <b>Healthy Cortex</b> (n=13)                                                    | 2.16 (0.12)                                        | 2.15 (0.13)                                                      | 1.93 (0.10)                                                    | 1.41 (0.09)                                                     |
| <b>Healthy Medulla</b> (n=13)                                                   | 2.21 (0.14)                                        | 2.24 (0.14)                                                      | 2.02 (0.11)                                                    | 1.55 (0.12)                                                     |
| <b>All solid lesions</b> (n=13)                                                 | 1.94 (0.32)                                        | 2.03 (0.56)                                                      | 1.71 (0.43)                                                    | 1.39 (0.35)                                                     |
| <b>Cyst</b> (n=5)                                                               | 3.04 (0.17)                                        | 2.95 (0.094)                                                     | 2.90 (0.11)                                                    | 2.74 (0.08)                                                     |
| <b>RCC</b> (n=11)                                                               | 1.90 (0.32)                                        | 1.99 (0.57)                                                      | 1.65 (0.40)                                                    | 1.34 (0.33)                                                     |
| <b>cc-RCC</b> (n=9)                                                             | 1.94 (0.33)                                        | 2.08 (0.60)                                                      | 1.71 (0.42)                                                    | 1.38 (0.34)                                                     |
| cc-RCC with sarcoïd differentiation, extensive necrosis and hemorrhaging (n=1)  | 1.77                                               | 1.63                                                             | 1.38                                                           | 1.04                                                            |
| cc-RCC with extensive necrosis (n=1)                                            | 1.19                                               | 1.09                                                             | 0.92                                                           | 0.71                                                            |
| cc-RCC with papillary growth (n=1)                                              | 1.82                                               | 1.81                                                             | 1.49                                                           | 1.19                                                            |
| cc-RCC with cells situated in nests and extravasation of erythrocytes (n=1)     | 1.94                                               | 2.01                                                             | 1.71                                                           | 1.71                                                            |
| cc-RCC with areas of low cell density, hemorrhaging and cystic structures (n=1) | 2.24                                               | 3.25                                                             | 1.90                                                           | 1.68                                                            |
| cc-RCC with extensive hemorrhage (n=1)                                          | 2.01                                               | 2.12                                                             | 1.71                                                           | 1.49                                                            |
| cc-RCC with cystic and solid areas (n=1)                                        | 2.20                                               | 2.17                                                             | 1.97                                                           | 1.69                                                            |
| cc-RCC with micro-cystic structures and hemorrhaging (n=1)                      | 2.17                                               | 2.61                                                             | 2.39                                                           | 1.68                                                            |
| <b>p-RCC</b> (n=2)                                                              | 1.68 (0.20)                                        | 1.57 (0.01)                                                      | 1.36 (0.06)                                                    | 1.14 (0.06)                                                     |
| Hemangioma (n=1)                                                                | 2.38                                               | 2.62 (0.16)                                                      | 2.45                                                           | 1.99                                                            |
| Oncocytoma (n = 1)                                                              | 1.98                                               | 2 (0.3)                                                          | 1.63                                                           | 1.36                                                            |

RCC = renal cell carcinoma, cc-RCC = clear cell renal cell carcinoma, p-RCC = papillary renal cell carcinoma
